# Supplementary material for: Flexible Electrode by Hydrographic Printing for Surface Electromyography Monitoring
Source: PubMed Central journal article supplement (PMC7287936; doi:10.3390/ma13102339), 2020-05-19
Supplement: materials-13-02339-s001.pdf [file materials-13-02339-s001.pdf]

Three independent graphs for sEMG recording under each movement are provided as supplement of the revised manuscript.

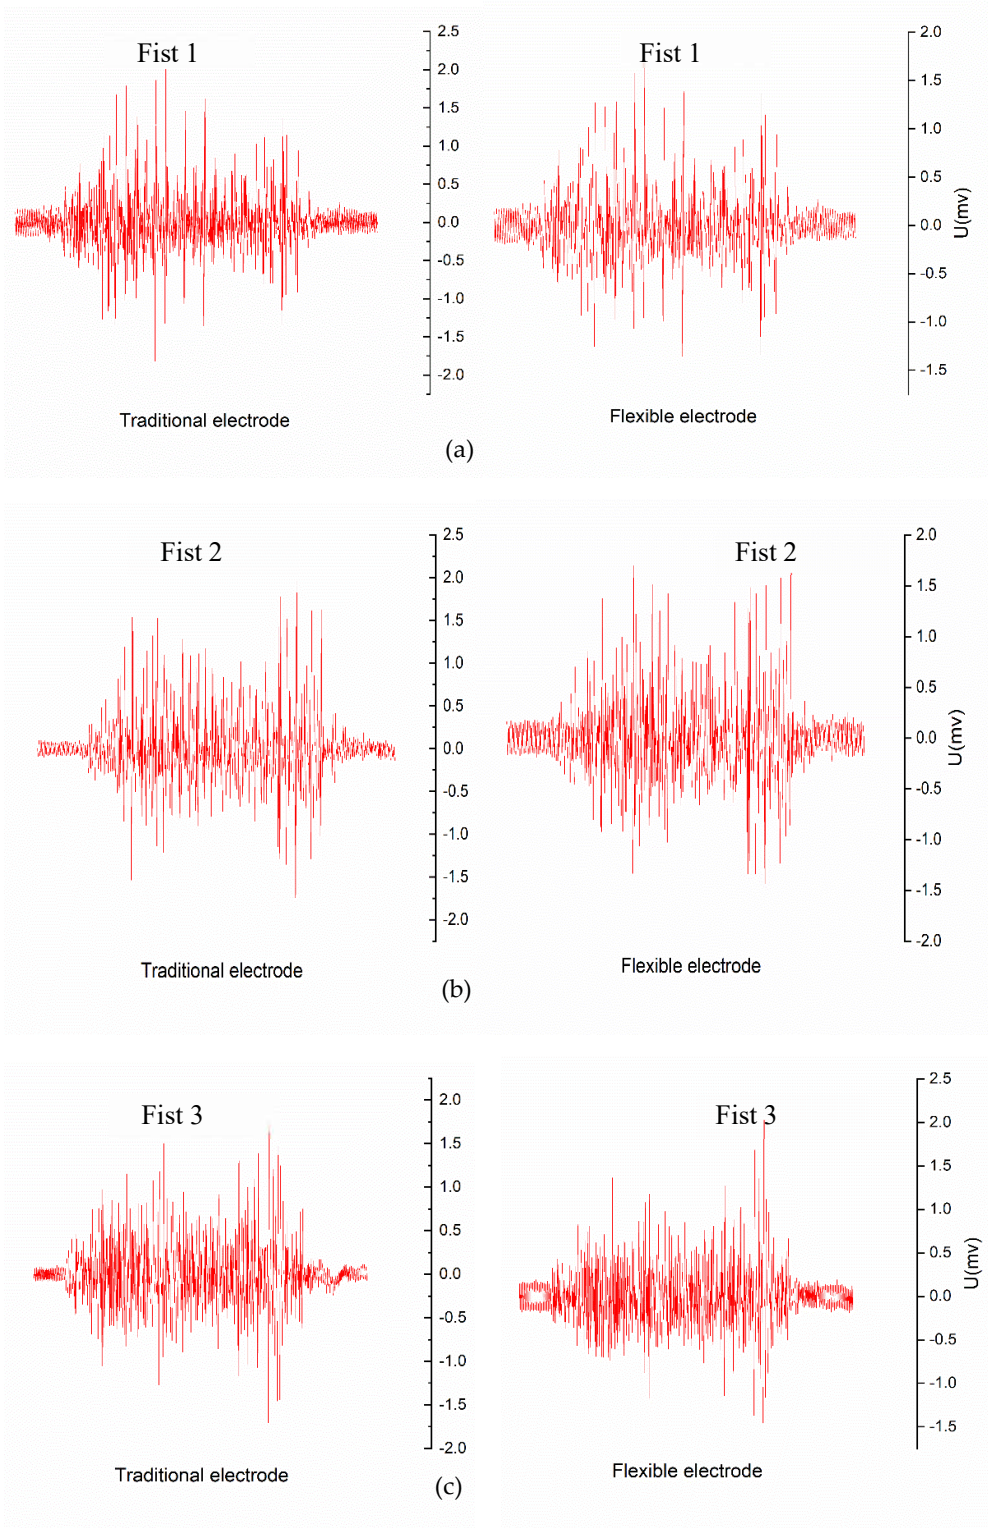

**Figure S1.** movement of fist (a) the sEMG of fist 1 (b) the sEMG of fist 2 (c) the sEMG of fist 3

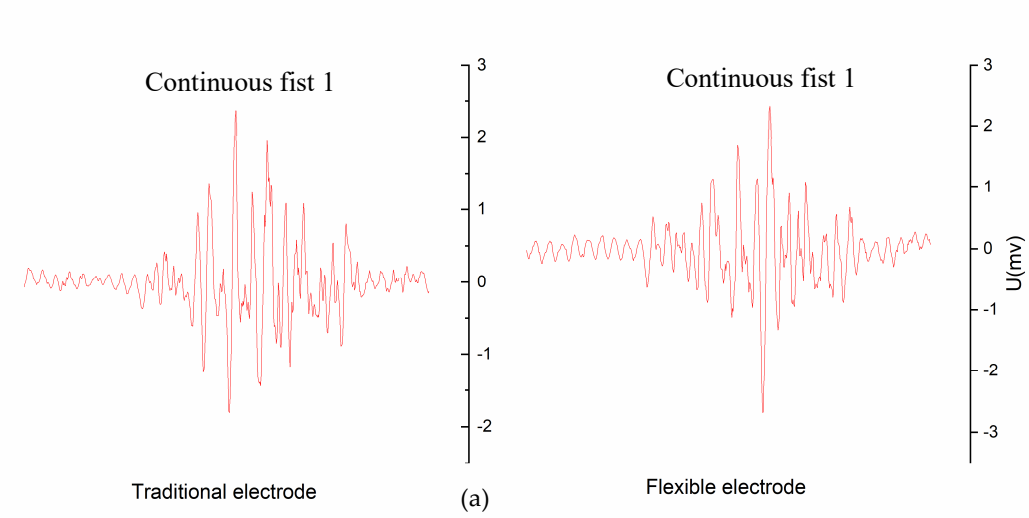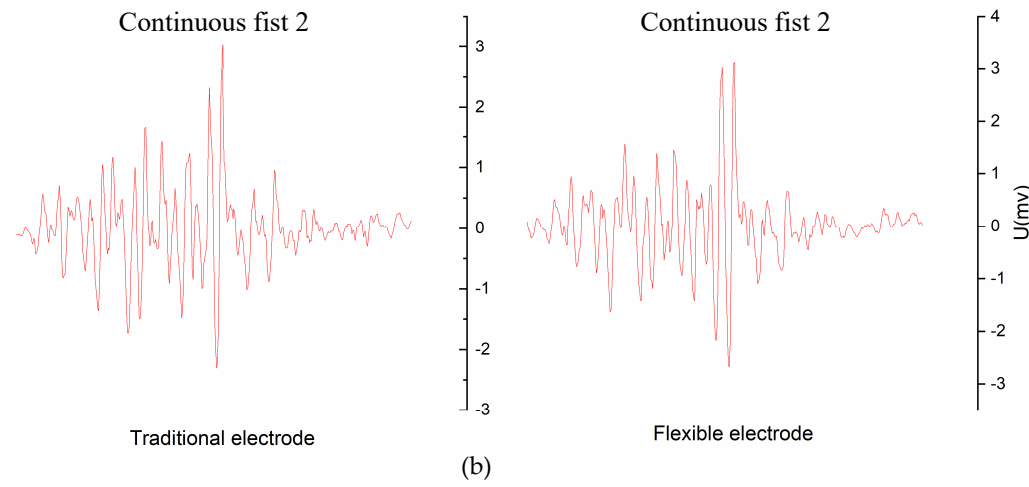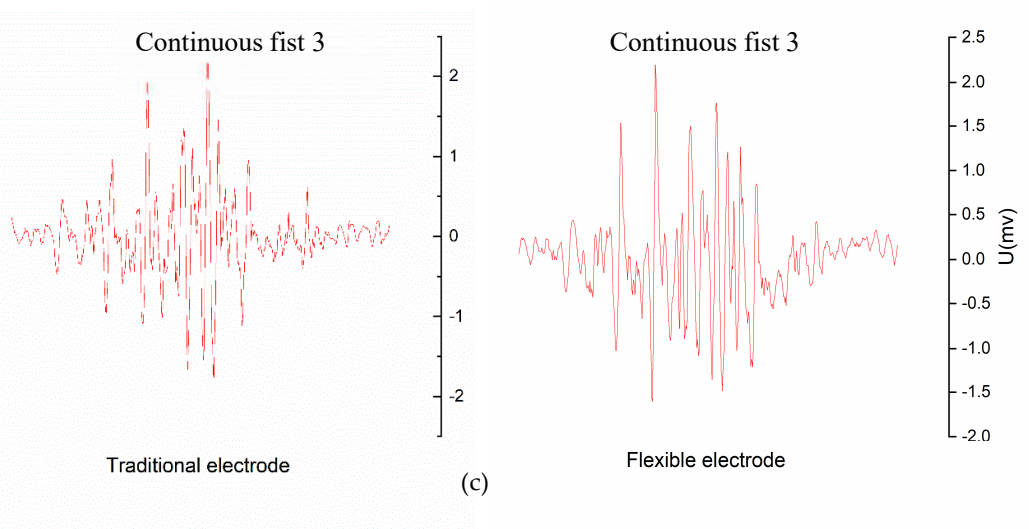

**Figure S2.** movement of continuous fist (a) the sEMG of continuous fist 1 (b) the sEMG of continuous fist 2 (c) the sEMG of continuous fist 3

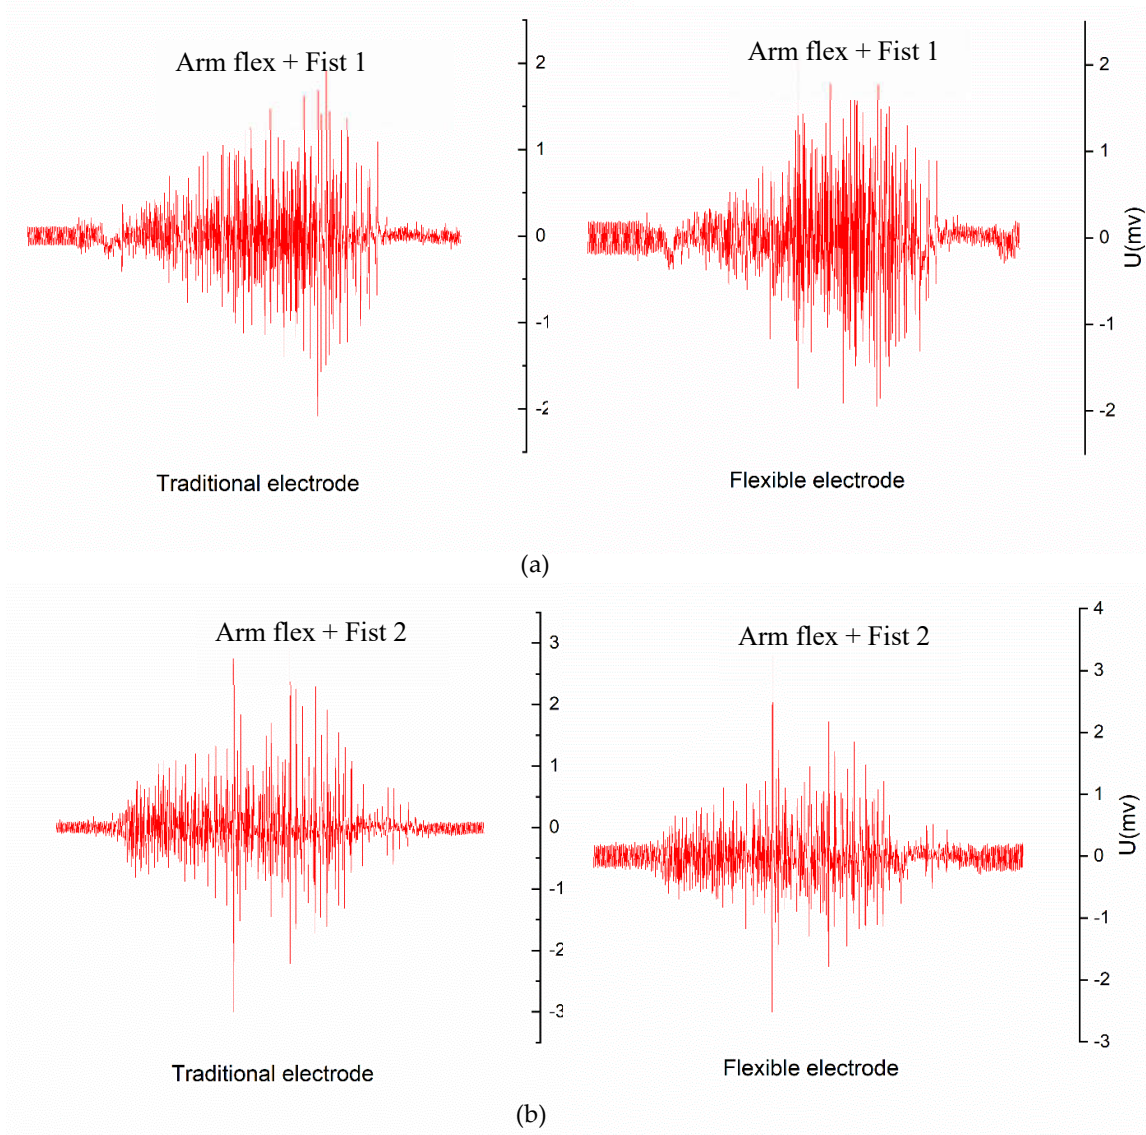

**Figure S3.** movements of arm flex combining fist (a) the sEMG of arm flex combining with fist 1 (b) the sEMG of arm flex combining with fist 2.
